# Supplementary material
Source: PubMed Central journal article supplement (PMC6651764)
Supplement: DS_10.1177_0022034519857714.pdf [file DS_10.1177_0022034519857714.pdf]

## **Systemic Immunologic Consequences of Chronic Periodontitis**

D.K. Gaudilliere, A. Culos, K. Djebali, A.S. Tsai, E.A. Ganio, W.M. Choi, X. Han, A. Maghaireh, B. Choisy, Q. Baca, J.F. Einhaus, J.J. Hedou, B. Bertrand, K. Ando, R. Fallahzadeh, M.S. Ghaemi, R. Okada, N. Stanley, A. Tanada, M. Tingle, T. Alpagot, A.J. Helms, M.S. Angst, N. Aghaeepour, and B. Gaudilliere

### **Supplementary Appendix**

Supplemental Materials and Methods.

Appendix Figure 1. Gating strategy.

Appendix Table 1. Antibody panel.

Appendix Table 2. Penalization matrix.

Appendix Table 3. csEN model immune features.

Appendix Table 4. Complete features of interest.

Appendix Table 5. Clinical correlation.

### **Appendix Materials and Methods**

#### *Sample Stimulation Conditions*

Whole-blood samples collected at baseline (n=28) and three weeks after treatment (n=16) were either left unstimulated or stimulated for 15 minutes at 37°C with one of four stimulation conditions (fig. 1A): *Pg*LPS at 1µg/mL (InvivoGen); IFNα at 100 ng/mL (PBL Assay Science); TNFα at 100ng/mL (PeproTech); or a cytokine cocktail containing IL-2/4/6 and GM-CSF at 100ng/mL each (BD). Samples were then fixed with proteomic stabilizer (SmartTube Inc.) and stored at -80°C until further processing.

#### *Mass Cytometry*

Samples were suspended in a hypotonic erythrocyte lysis buffer (SmartTube, Inc.) according to manufacturer instructions. Isolated cells were barcoded as previously described (Behbehani et al. 2014) and stained with a 45-parameter panel for comprehensive characterization of the activity of major immune cell subsets (table S1). Cells were incubated with an iridium-containing intercalator (Fluidigm) overnight at 4°C. Samples were analyzed using the Helios Mass Cytometer (Fluidigm) using normalization beads (Finck et al. 2013) and normalized collectively using Normalizer v0.1 MATLAB Compiler Runtime (MathWorks) (fig. 1B). Files were de-barcoded with a single-cell MATLAB debarcoding tool (Zunder et al. 2015). As our analysis focused on the functional response of each cell type (signaling responses), manual gating was chosen over an unsupervised clustering approach to limit the analysis to the major immune cell subsets, thereby controlling the number of immune features measured and increasing interpretability of results. This selection of cell subsets is also required by the csEN algorithm, which could not be applied with automated gating strategies as the automatically identified clusters are unlabeled and cannot be matched to prior knowledge. Manual gating was performed using Cytobank (fig. S1). A total of 900 immune features were extracted from each blood sample including the frequencies of 18 immune cell subsets representing major innate and adaptive compartments (table S2), their endogenous intracellular signaling activities, and the capacities of each cell

subset to respond to a series of receptor-specific immune challenges including stimulation with *Pg*LPS, IFN $\alpha$ , TNF $\alpha$  and IL-2/4/6 with GM-CSF (fig. 1A).

*Pg*LPS was used as *Pg* is an important bacterium in the local pathogenesis of periodontitis via its virulence factor LPS, which has been shown to directly trigger signaling responses in a variety of cell types (Kocgozlu et al. 2009). IFN $\alpha$  was used as type I interferons are also necessary for the progression of periodontitis; upregulation of IFN  $\alpha$  in periodontitis supports our hypothesis that immune cells in patients with ChP are primed for pro-inflammatory responses (Martin et al. 2001; Mizraji et al. 2017). TNF $\alpha$  was used as it is strongly associated with pathophysiological features of periodontitis, including attachment loss and bone resorption (Graves and Cochran 2003). The cytokine cocktail including IL-2/4/6 and GM-CSF was chosen as IL-2/4/6 are all upregulated in patients with periodontitis (Hegde and Awan 2018; McFarlane and Meikle 1991). The primary goal of our ex-vivo stimulation experiments was to evaluate the integrity of intracellular signaling pathways activated downstream of a subset of inflammatory mediators known to be increased in patients with ChP (including *pg*LPS, TNF $\alpha$ , IL-2/4/6, GMCSF, and IFN $\alpha$ ). Specifically, stimulation experiments with *pg*LPS, TNF $\alpha$ , IL-2/4/6, GMCSF, and IFN $\alpha$ , respectively test the hypotheses of whether Toll Like Receptor 2/4-, TNF receptor- $\alpha$ , Type I (IL-2/4/6/GMCSF) and Type II (IFN $\alpha$ ) cytokine receptor-dependent intracellular signaling responses are differentially regulated in patients with ChP compared to controls. Immune features were derived from measurements performed in whole-blood samples, which allowed the functional assessment of all peripheral immune cell subsets while minimizing perturbations by experimental processing.

### **Statistical Analysis**

Statistical analysis of the mass cytometry data derived from analysis of samples from 28 patients before treatment was performed using the cell-signaling Elastic Net (csEN) method (Aghaeepour et al. 2017); the dataset was complete, with no missing data. A power analysis was not performed for this first exploratory analysis. Briefly, the cell-signaling (cs)EN method developed by Aghaeepour et al., an adaptation of the existing EN regularized regression method, has been shown to significantly outperform the existing EN algorithm (Aghaeepour et al. 2017). The csEN considers previous biological knowledge of cell-type and receptor-specific signaling pathway activation that inherently influences the generation and interpretation of mass cytometry datasets. As such, the csEN prioritizes canonical signaling responses to selected stimulation conditions using a cell signaling-based penalization matrix, such as toll-like receptors 2 and 4 (TLR-2/4) signaling response to *Pg*LPS in innate immune cells and JAK/STAT signaling responses to IFN $\alpha$  in innate and adaptive immune cells, figure 2A and table S2.

We adapted an independently developed cell signaling-based penalization matrix that accounted for whether a cell-type- and receptor-specific signaling response to each stimulation condition is supported by prior knowledge of signal transduction pathways (table S2).

As the csEN has not been previously used to separate patients from controls, it was amended as follows: given a set of immune features,  $X$ , and a vector classifying participants as “Control” or “Patient”,  $Y$ , a multivariate model is generated by calculating

the coefficients,  $\beta$ , that minimize the negative binomial log-likelihood of the regression model:

$$-\left[\frac{1}{N} \sum_{i=1}^N y_i \cdot (\beta_0 + x^T \beta) - \log(1 + e^{(\beta_0 + x^T \beta)})\right]$$

The L1 penalty of the least absolute shrinkage and selection operator (LASSO) (Tibshirani 1996) and L2 penalty of Ridge Regression (Hoerl and Kennard 1970) are added to this calculation by including two hyper parameters  $\lambda$  (the penalization factor) and  $\alpha$  (which determines the relative contributions of the penalties):

$$\lambda \left[ \frac{(1 - \alpha) \|\beta\|_2^2}{2} + \alpha \|\beta\|_1 \right]$$

Including these penalties in the fitting process allows for both sparsity in the model and inclusion of highly inter-correlated features. To incorporate previous biological knowledge, a scale factor,  $\phi$ , is added to the negative binomial log-likelihood, resulting in the objective function:

**Eq. 1.**  $L(\beta) = -\left[\frac{1}{N} \sum_{i=1}^N y_i \cdot (\beta_0 + \phi x^T \beta) - \log(1 + e^{(\beta_0 + \phi x^T \beta)})\right] + \lambda \left[ \frac{(1 - \alpha) \|\beta\|_2^2}{2} + \alpha \|\beta\|_1 \right]$

Eq. 1 defines the three parameters ( $\alpha, \lambda, \phi$ ) csEN requires for a binomial regression. The csEN was applied to the baseline mass cytometry dataset. A repeated hold-out method consisting of 4000 repetitions with 22 training observations and six test observations was used to validate the model. For each hold-out instance, parameters were optimized by a gradient-free optimization algorithm which maximizes the Area Under the Recovery Operator Curve (AUROC) during cross-validation of the training samples. A vector of average predictions across each hold-out instance was used in the Wilcoxon rank sum test.

For comparison of csEN model prediction before and after treatment, model coefficients across each hold-out instance were aggregated for projection on samples collected from a subset of patients before and at three weeks after treatment (n=16, Fig. 4). As such, the csEN model trained on baseline immune features from 28 patients provided a unique prediction before and after treatment the study participants that were followed after treatment. These projected values were used during visualization of three-week status. This mean coefficient model was also used for the creation of all related figures.

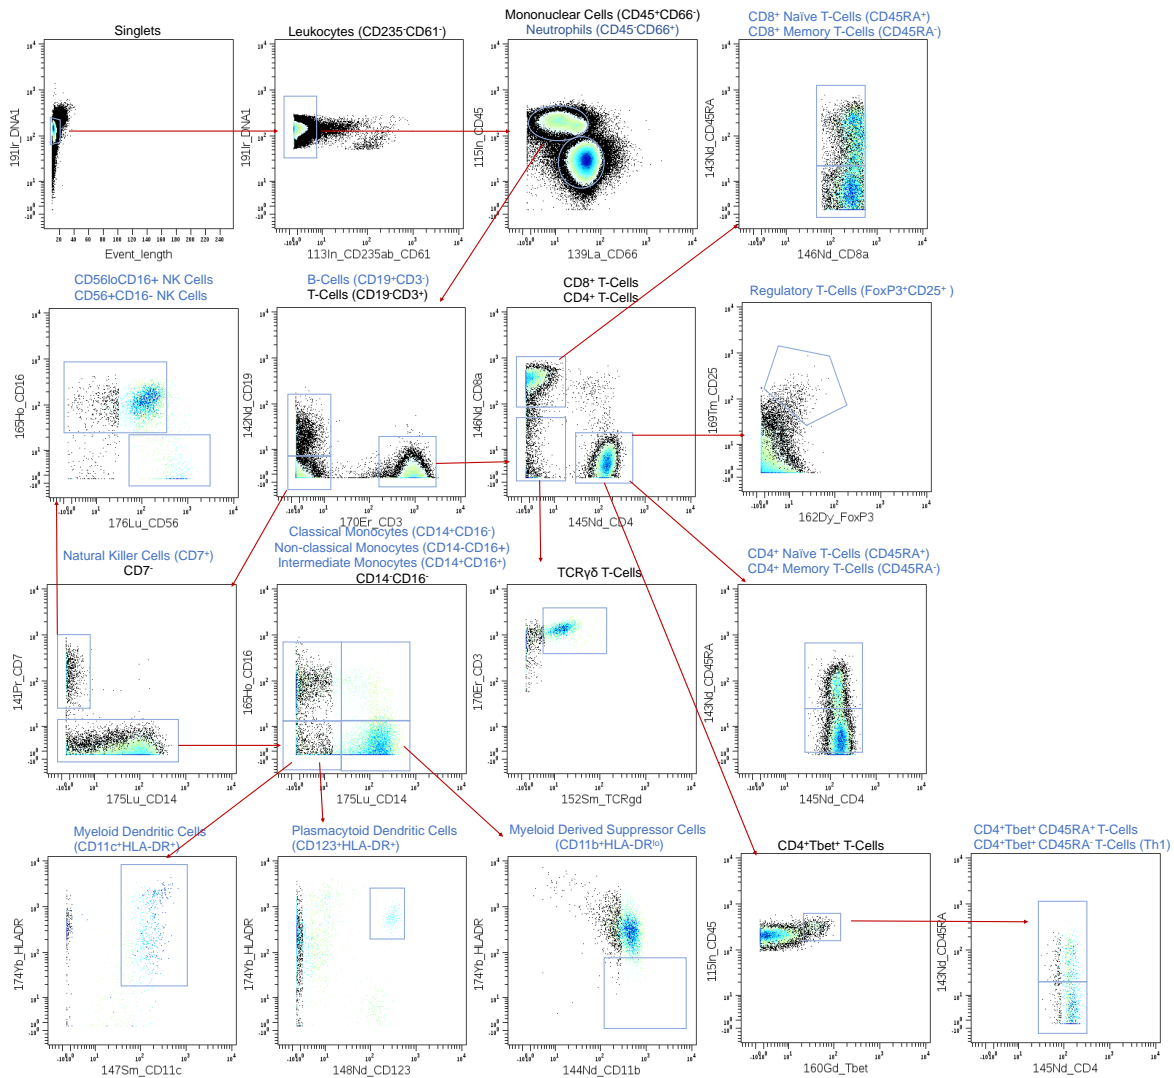

**Appendix Figure 1. Gating strategy of immune cell subsets.** Two-dimensional mass cytometry plots are shown for a representative patient sample. Gating was performed using Cytobank ([www.cytobank.org](http://www.cytobank.org)). Cell types included in the analysis are indicated in blue.

**Appendix Table 1. Antibody panel used for mass cytometry analysis**

| Antibody           | Manufacturer   | Symbol | Mass | Clone      | Comment   | Control<br>(mean signal) | ChP<br>(mean signal) |
|--------------------|----------------|--------|------|------------|-----------|--------------------------|----------------------|
| Barcode 1          | Trace          | Pd     | 102  |            | Barcode   |                          |                      |
| Barcode 2          | Trace          | Pd     | 104  |            | Barcode   |                          |                      |
| Barcode 3          | Trace          | Pd     | 105  |            | Barcode   |                          |                      |
| Barcode 4          | Trace          | Pd     | 106  |            | Barcode   |                          |                      |
| Barcode 5          | Trace          | Pd     | 108  |            | Barcode   |                          |                      |
| Barcode 6          | Trace          | Pd     | 110  |            | Barcode   |                          |                      |
| CD235ab*           | Biologend      | In     | 113  | HIR2       | Phenotype | 0.85                     | 0.83                 |
| CD61*              | BD             | In     | 113  | VI-PL2     | Phenotype | 0.85                     | 0.83                 |
| CD45               | Biologend      | In     | 115  | HI30       | Phenotype | 133.18                   | 145.40               |
| CD66               | BD             | La     | 139  | CD66a-B1.1 | Phenotype | 96.09                    | 90.35                |
| CD7                | BD             | Pr     | 141  | M-T701     | Phenotype | 1.54                     | 1.40                 |
| CD19               | Biologend      | Nd     | 142  | HIB19      | Phenotype | 0.74                     | 0.76                 |
| CD45RA             | Biologend      | Nd     | 143  | HI100      | Phenotype | 9.31                     | 9.10                 |
| CD11b              | Fluidigm       | Nd     | 144  | ICRF44     | Phenotype | 295.57                   | 291.33               |
| CD4                | Fluidigm       | Nd     | 145  | RPA-T4     | Phenotype | 4.23                     | 4.32                 |
| CD8a               | Fluidigm       | Nd     | 146  | RPA-T8     | Phenotype | 2.57                     | 2.45                 |
| CD11c              | Fluidigm       | Sm     | 147  | Bu15       | Phenotype | 20.23                    | 22.62                |
| CD123              | Biologend      | Nd     | 148  | 6H6        | Phenotype | 0.37                     | 0.39                 |
| pCREB              | Cell Signaling | Sm     | 149  | 87G3       | Function  | 3.47                     | 3.08                 |
| pSTAT5             | Fluidigm       | Nd     | 150  | 47         | Function  | 5.79                     | 5.59                 |
| pp38               | BD             | Eu     | 151  | 36/p38     | Function  | 0.22                     | 0.14                 |
| TCR $\gamma\delta$ | Fluidigm       | Sm     | 152  | 11F2       | Phenotype | 0.45                     | 0.45                 |
| pSTAT1             | Fluidigm       | Eu     | 153  | 58D6       | Function  | 1.16                     | 1.07                 |
| pSTAT3             | Cell Signaling | Sm     | 154  | M9C6       | Function  | 2.77                     | 2.88                 |
| pS6                | Cell Signaling | Gd     | 155  | D57.2.2E   | Function  | 2.50                     | 2.35                 |
| CD24               | Biologend      | Gd     | 156  | ML5        | Phenotype | 86.81                    | 95.68                |
| CD38               | Biologend      | Gd     | 157  | HIT2       | Phenotype | 30.67                    | 28.88                |
| CD33               | Fluidigm       | Gd     | 158  | WM53       | Phenotype | 7.23                     | 5.64                 |
| pMAPKAPK2          | Fluidigm       | Tb     | 159  | 27B7       | Function  | 7.67                     | 7.49                 |
| Tbet               | Fluidigm       | Gd     | 160  | 4B10       | Phenotype | 4.75                     | 4.62                 |
| cPARP              | BD             | Dy     | 161  | F21-852    | Function  | 0.36                     | 0.38                 |
| FoxP3              | Fluidigm       | Dy     | 162  | PCH101     | Phenotype | 6.05                     | 5.77                 |
| I $\kappa$ B       | Fluidigm       | Dy     | 164  | L35A5      | Function  | 3.60                     | 3.35                 |
| CD16               | Fluidigm       | Ho     | 165  | 3G8        | Phenotype | 153.73                   | 138.98               |
| pNF $\kappa$ B     | Fluidigm       | Er     | 166  | K10-       | Function  | 4.65                     | 4.68                 |
| pERK1/2            | Fluidigm       | Er     | 167  | D13.14.4E  | Function  | 0.73                     | 0.67                 |
| pSTAT6             | Fluidigm       | Er     | 168  | 18         | Function  | 0.60                     | 0.54                 |
| CD25               | Biologend      | Tm     | 169  | M-A251     | Phenotype | 0.03                     | 0.02                 |
| CD3                | Fluidigm       | Er     | 170  | UCHT1      | Phenotype | 1.06                     | 0.87                 |
| CD27               | BD             | Yb     | 171  | M-T271     | Phenotype | 1.99                     | 1.88                 |
| CD15               | Fluidigm       | Yb     | 172  | W6D3       | Phenotype | 131.38                   | 142.24               |
| CCR2               | Biologend      | Yb     | 173  | K036C2     | Phenotype | 9.28                     | 9.06                 |
| HLA-DR             | Fluidigm       | Yb     | 174  | L243       | Phenotype | 1.89                     | 1.95                 |
| CD14               | Fluidigm       | Yb     | 175  | M5E2       | Phenotype | 0.02                     | 0.03                 |
| CD56               | BD             | Yb     | 176  | NCAM16.2   | Phenotype | 1.72                     | 1.69                 |
| DNA1               | Fluidigm       | Ir     | 191  |            | DNA       |                          |                      |
| DNA2               | Fluidigm       | Ir     | 192  |            | DNA       |                          |                      |

\* CD235ab and CD61 were run on the same metal.

**Appendix Table 2. Signaling responses prioritized in the signaling-based penalization matrix**

**A.**

| Unstimulated                                                         | CREB | ERK | IκB | MK2 | NF-κB | P38 | S6 | STAT1 | STAT3 | STAT5 | STAT6 |
|----------------------------------------------------------------------|------|-----|-----|-----|-------|-----|----|-------|-------|-------|-------|
| Nφs                                                                  | ✓    | ✓   | ✓   | ✓   | ✓     | ✓   | ✓  | ✓     | ✓     | ✓     | ✓     |
| cMCs                                                                 | ✓    | ✓   | ✓   | ✓   | ✓     | ✓   | ✓  | ✓     | ✓     | ✓     | ✓     |
| ncMCs                                                                | ✓    | ✓   | ✓   | ✓   | ✓     | ✓   | ✓  | ✓     | ✓     | ✓     | ✓     |
| intMCs                                                               | ✓    | ✓   | ✓   | ✓   | ✓     | ✓   | ✓  | ✓     | ✓     | ✓     | ✓     |
| M-MDSCs                                                              | ✓    | ✓   | ✓   | ✓   | ✓     | ✓   | ✓  | ✓     | ✓     | ✓     | ✓     |
| mDCs                                                                 | ✓    | ✓   | ✓   | ✓   | ✓     | ✓   | ✓  | ✓     | ✓     | ✓     | ✓     |
| pDCs                                                                 | ✓    | ✓   | ✓   | ✓   | ✓     | ✓   | ✓  | ✓     | ✓     | ✓     | ✓     |
| NK Cells                                                             | ✓    | ✓   | ✓   | ✓   | ✓     | ✓   | ✓  | ✓     | ✓     | ✓     | ✓     |
| CD56 <sup>lo</sup> CD16 <sup>+</sup><br>NK Cells                     | ✓    | ✓   | ✓   | ✓   | ✓     | ✓   | ✓  | ✓     | ✓     | ✓     | ✓     |
| CD56 <sup>+</sup> CD16 <sup>-</sup><br>NK Cells                      | ✓    | ✓   | ✓   | ✓   | ✓     | ✓   | ✓  | ✓     | ✓     | ✓     | ✓     |
| CD4 <sup>+</sup><br>T-Cells <sub>mem</sub>                           | ✓    | ✓   | ✓   | ✓   | ✓     | ✓   | ✓  | ✓     | ✓     | ✓     | ✓     |
| CD4 <sup>+</sup><br>T-Cells <sub>naive</sub>                         | ✓    | ✓   | ✓   | ✓   | ✓     | ✓   | ✓  | ✓     | ✓     | ✓     | ✓     |
| CD45RA <sup>-</sup><br>Tbet <sup>+</sup> CD4 <sup>+</sup><br>T-Cells | ✓    | ✓   | ✓   | ✓   | ✓     | ✓   | ✓  | ✓     | ✓     | ✓     | ✓     |
| CD45RA <sup>+</sup> Tbet <sup>+</sup><br>CD4 <sup>+</sup> T-cells    | ✓    | ✓   | ✓   | ✓   | ✓     | ✓   | ✓  | ✓     | ✓     | ✓     | ✓     |
| Tregs                                                                | ✓    | ✓   | ✓   | ✓   | ✓     | ✓   | ✓  | ✓     | ✓     | ✓     | ✓     |
| CD8 <sup>+</sup><br>T-Cells <sub>mem</sub>                           | ✓    | ✓   | ✓   | ✓   | ✓     | ✓   | ✓  | ✓     | ✓     | ✓     | ✓     |
| CD8 <sup>+</sup><br>T-Cells <sub>naive</sub>                         | ✓    | ✓   | ✓   | ✓   | ✓     | ✓   | ✓  | ✓     | ✓     | ✓     | ✓     |
| B-Cells                                                              | ✓    | ✓   | ✓   | ✓   | ✓     | ✓   | ✓  | ✓     | ✓     | ✓     | ✓     |

**B.**

| PgLPS                                                                   | CREB | ERK | IκB | MK2 | NF-κB | p38 | S6 | STAT1 | STAT3 | STAT5 | STAT6 |
|-------------------------------------------------------------------------|------|-----|-----|-----|-------|-----|----|-------|-------|-------|-------|
| Nφs                                                                     | ✓    | ✓   | ✓   | ✓   | ✓     | ✓   | ✓  |       |       |       |       |
| cMCs                                                                    | ✓    | ✓   | ✓   | ✓   | ✓     | ✓   | ✓  |       |       |       |       |
| ncMCs                                                                   | ✓    | ✓   | ✓   | ✓   | ✓     | ✓   | ✓  |       |       |       |       |
| intMCs                                                                  | ✓    | ✓   | ✓   | ✓   | ✓     | ✓   | ✓  |       |       |       |       |
| M-MDSCs                                                                 | ✓    | ✓   | ✓   | ✓   | ✓     | ✓   | ✓  |       |       |       |       |
| mDCs                                                                    | ✓    | ✓   | ✓   | ✓   | ✓     | ✓   | ✓  |       |       |       |       |
| pDCs                                                                    |      |     |     |     |       |     |    |       |       |       |       |
| NK Cells                                                                | ✓    | ✓   | ✓   | ✓   | ✓     | ✓   | ✓  |       |       |       |       |
| CD56 <sup>lo</sup> CD16 <sup>+</sup><br>NK Cells                        | ✓    | ✓   | ✓   | ✓   | ✓     | ✓   | ✓  |       |       |       |       |
| CD56 <sup>+</sup> CD16 <sup>-</sup><br>NK Cells                         | ✓    | ✓   | ✓   | ✓   | ✓     | ✓   | ✓  |       |       |       |       |
| CD4 <sup>+</sup><br>T-Cells <sub>mem</sub>                              |      |     |     |     |       |     |    |       |       |       |       |
| CD4 <sup>+</sup><br>T-Cells <sub>naive</sub>                            |      |     |     |     |       |     |    |       |       |       |       |
| CD45RA <sup>-</sup><br>Tbet <sup>+</sup><br>CD4 <sup>+</sup><br>T-Cells |      |     |     |     |       |     |    |       |       |       |       |
| CD45RA <sup>+</sup> Tbe                                                 |      |     |     |     |       |     |    |       |       |       |       |

|                                              |   |   |   |   |   |   |   |  |  |  |  |  |
|----------------------------------------------|---|---|---|---|---|---|---|--|--|--|--|--|
| t <sup>+</sup><br>CD4 <sup>+</sup> T-cells   |   |   |   |   |   |   |   |  |  |  |  |  |
| Tregs                                        | ✓ | ✓ | ✓ | ✓ | ✓ | ✓ | ✓ |  |  |  |  |  |
| CD8 <sup>+</sup><br>T-Cells <sub>mem</sub>   |   |   |   |   |   |   |   |  |  |  |  |  |
| CD8 <sup>+</sup><br>T-Cells <sub>naive</sub> |   |   |   |   |   |   |   |  |  |  |  |  |
| B-Cells                                      |   |   |   |   |   |   |   |  |  |  |  |  |

### C.

| IFN $\alpha$                                                         | CREB | ERK | I $\kappa$ B | MK2 | NF- $\kappa$ B | p38 | S6 | STAT1 | STAT3 | STAT5 | STAT6 |
|----------------------------------------------------------------------|------|-----|--------------|-----|----------------|-----|----|-------|-------|-------|-------|
| N $\phi$ s                                                           |      |     |              |     |                |     |    | ✓     | ✓     | ✓     | ✓     |
| cMCs                                                                 |      |     |              |     |                |     |    | ✓     | ✓     | ✓     | ✓     |
| ncMCs                                                                |      |     |              |     |                |     |    | ✓     | ✓     | ✓     | ✓     |
| intMCs                                                               |      |     |              |     |                |     |    | ✓     | ✓     | ✓     | ✓     |
| M-MDSCs                                                              |      |     |              |     |                |     |    | ✓     | ✓     | ✓     | ✓     |
| mDCs                                                                 |      |     |              |     |                |     |    | ✓     | ✓     | ✓     | ✓     |
| pDCs                                                                 |      |     |              |     |                |     |    | ✓     | ✓     | ✓     | ✓     |
| NK Cells                                                             |      |     |              |     |                |     |    | ✓     | ✓     | ✓     | ✓     |
| CD56 <sup>lo</sup> CD16 <sup>+</sup><br>NK Cells                     |      |     |              |     |                |     |    | ✓     | ✓     | ✓     | ✓     |
| CD56 <sup>+</sup> CD16 <sup>-</sup><br>NK Cells                      |      |     |              |     |                |     |    | ✓     | ✓     | ✓     | ✓     |
| CD4 <sup>+</sup><br>T-Cells <sub>mem</sub>                           |      |     |              |     |                |     |    | ✓     | ✓     | ✓     | ✓     |
| CD4 <sup>+</sup><br>T-Cells <sub>naive</sub>                         |      |     |              |     |                |     |    | ✓     | ✓     | ✓     | ✓     |
| CD45RA <sup>-</sup> Tbet <sup>+</sup><br>CD4 <sup>+</sup><br>T-Cells |      |     |              |     |                |     |    | ✓     | ✓     | ✓     | ✓     |
| CD45RA <sup>+</sup> Tbet <sup>+</sup><br>CD4 <sup>+</sup> T-cells    |      |     |              |     |                |     |    | ✓     | ✓     | ✓     | ✓     |
| Tregs                                                                |      |     |              |     |                |     |    | ✓     | ✓     | ✓     | ✓     |
| CD8 <sup>+</sup><br>T-Cells <sub>mem</sub>                           |      |     |              |     |                |     |    | ✓     | ✓     | ✓     | ✓     |
| CD8 <sup>+</sup><br>T-Cells <sub>naive</sub>                         |      |     |              |     |                |     |    | ✓     | ✓     | ✓     | ✓     |
| B-Cells                                                              |      |     |              |     |                |     |    | ✓     | ✓     | ✓     | ✓     |

### D.

| TNF $\alpha$                                     | CREB | ERK | I $\kappa$ B | MK2 | NF- $\kappa$ B | p38 | S6 | STAT1 | STAT3 | STAT5 | STAT6 |
|--------------------------------------------------|------|-----|--------------|-----|----------------|-----|----|-------|-------|-------|-------|
| N $\phi$ s                                       | ✓    | ✓   | ✓            | ✓   | ✓              | ✓   | ✓  |       |       |       |       |
| cMCs                                             | ✓    | ✓   | ✓            | ✓   | ✓              | ✓   | ✓  |       |       |       |       |
| ncMCs                                            | ✓    | ✓   | ✓            | ✓   | ✓              | ✓   | ✓  |       |       |       |       |
| intMCs                                           | ✓    | ✓   | ✓            | ✓   | ✓              | ✓   | ✓  |       |       |       |       |
| M-MDSCs                                          | ✓    | ✓   | ✓            | ✓   | ✓              | ✓   | ✓  |       |       |       |       |
| mDCs                                             | ✓    | ✓   | ✓            | ✓   | ✓              | ✓   | ✓  |       |       |       |       |
| pDCs                                             | ✓    | ✓   | ✓            | ✓   | ✓              | ✓   | ✓  |       |       |       |       |
| NK Cells                                         | ✓    | ✓   | ✓            | ✓   | ✓              | ✓   | ✓  |       |       |       |       |
| CD56 <sup>lo</sup> CD16 <sup>+</sup><br>NK Cells | ✓    | ✓   | ✓            | ✓   | ✓              | ✓   | ✓  |       |       |       |       |
| CD56 <sup>+</sup> CD16 <sup>-</sup><br>NK Cells  | ✓    | ✓   | ✓            | ✓   | ✓              | ✓   | ✓  |       |       |       |       |

|                                                                   |   |   |   |   |   |   |   |  |  |  |  |
|-------------------------------------------------------------------|---|---|---|---|---|---|---|--|--|--|--|
| CD4 <sup>+</sup><br>T-Cells <sub>mem</sub>                        | ✓ | ✓ | ✓ | ✓ | ✓ | ✓ | ✓ |  |  |  |  |
| CD4 <sup>+</sup><br>T-Cells <sub>naive</sub>                      | ✓ | ✓ | ✓ | ✓ | ✓ | ✓ | ✓ |  |  |  |  |
| CD45RA <sup>-</sup> Tbet <sup>+</sup><br>CD4 <sup>+</sup> T-Cells | ✓ | ✓ | ✓ | ✓ | ✓ | ✓ | ✓ |  |  |  |  |
| CD45RA <sup>+</sup> Tbet <sup>+</sup><br>CD4 <sup>+</sup> T-cells | ✓ | ✓ | ✓ | ✓ | ✓ | ✓ | ✓ |  |  |  |  |
| Tregs                                                             | ✓ | ✓ | ✓ | ✓ | ✓ | ✓ | ✓ |  |  |  |  |
| CD8 <sup>+</sup><br>T-Cells <sub>mem</sub>                        | ✓ | ✓ | ✓ | ✓ | ✓ | ✓ | ✓ |  |  |  |  |
| CD8 <sup>+</sup><br>T-Cells <sub>naive</sub>                      | ✓ | ✓ | ✓ | ✓ | ✓ | ✓ | ✓ |  |  |  |  |
| B-Cells                                                           | ✓ | ✓ | ✓ | ✓ | ✓ | ✓ | ✓ |  |  |  |  |

### E.

| IL-2/4/6,<br>GM-CSF                                               | CREB | ERK | IκB | MK2 | NF-κB | p38 | S6 | STAT1 | STAT3 | STAT5 | STAT6 |
|-------------------------------------------------------------------|------|-----|-----|-----|-------|-----|----|-------|-------|-------|-------|
| Nφs                                                               |      | ✓   |     |     |       |     |    | ✓     | ✓     | ✓     | ✓     |
| cMCs                                                              |      | ✓   |     |     |       |     |    | ✓     | ✓     | ✓     | ✓     |
| ncMCs                                                             |      | ✓   |     |     |       |     |    | ✓     | ✓     | ✓     | ✓     |
| intMCs                                                            |      | ✓   |     |     |       |     |    | ✓     | ✓     | ✓     | ✓     |
| M-MDSCs                                                           |      | ✓   |     |     |       |     |    | ✓     | ✓     | ✓     | ✓     |
| mDCs                                                              |      | ✓   |     |     |       |     |    | ✓     | ✓     | ✓     | ✓     |
| pDCs                                                              |      | ✓   |     |     |       |     |    | ✓     | ✓     | ✓     | ✓     |
| NK Cells                                                          |      | ✓   |     |     |       |     |    | ✓     | ✓     | ✓     | ✓     |
| CD56 <sup>lo</sup> CD16 <sup>+</sup><br>NK Cells                  |      | ✓   |     |     |       |     |    | ✓     | ✓     | ✓     | ✓     |
| CD56 <sup>+</sup> CD16 <sup>-</sup><br>NK Cells                   |      | ✓   |     |     |       |     |    | ✓     | ✓     | ✓     | ✓     |
| CD4 <sup>+</sup><br>T-Cells <sub>mem</sub>                        |      | ✓   |     |     |       |     |    | ✓     | ✓     | ✓     | ✓     |
| CD4 <sup>+</sup><br>T-Cells <sub>naive</sub>                      |      | ✓   |     |     |       |     |    | ✓     | ✓     | ✓     | ✓     |
| CD45RA <sup>-</sup> Tbet <sup>+</sup><br>CD4 <sup>+</sup> T-Cells |      | ✓   |     |     |       |     |    | ✓     | ✓     | ✓     | ✓     |
| CD45RA <sup>+</sup> Tbet <sup>+</sup><br>CD4 <sup>+</sup> T-cells |      | ✓   |     |     |       |     |    | ✓     | ✓     | ✓     | ✓     |
| Tregs                                                             |      | ✓   |     |     |       |     |    | ✓     | ✓     | ✓     | ✓     |
| CD8 <sup>+</sup><br>T-Cells <sub>mem</sub>                        |      | ✓   |     |     |       |     |    | ✓     | ✓     | ✓     | ✓     |
| CD8 <sup>+</sup><br>T-Cells <sub>naive</sub>                      |      | ✓   |     |     |       |     |    | ✓     | ✓     | ✓     | ✓     |
| B-Cells                                                           |      | ✓   |     |     |       |     |    | ✓     | ✓     | ✓     | ✓     |



**Appendix Table 3.** csEN model immune features, p-value, coefficient. Ranked by p-value.

| Stimulation      | Cell Type                                                     | Signaling Protein | p-value  | coefficient |
|------------------|---------------------------------------------------------------|-------------------|----------|-------------|
| IFN $\alpha$     | CD8 <sup>+</sup> T-cells <sub>naive</sub>                     | pCREB             | 0.001729 | 0.028943    |
| PgLPS            | mDCs                                                          | pSTAT5            | 0.001729 | 0.030384    |
| IL-2/4/6, GM-CSF | CD56 <sup>lo</sup> CD16 <sup>+</sup> NK Cells                 | pSTAT1            | 0.002078 | -0.02417    |
| IL-2/4/6, GM-CSF | NK Cells                                                      | pSTAT1            | 0.002486 | -0.0144     |
| PgLPS            | ncMCs                                                         | pSTAT5            | 0.002486 | 0.029313    |
| IL-2/4/6, GM-CSF | NK Cells                                                      | pMAPKAPK2         | 0.004906 | -0.02397    |
| TNF $\alpha$     | NK Cells                                                      | pMAPKAPK2         | 0.005761 | -0.01478    |
| PgLPS            | CD8 <sup>+</sup> T-cells <sub>naive</sub>                     | pSTAT1            | 0.006743 | 0.026939    |
| TNF $\alpha$     | CD56 <sup>lo</sup> CD16 <sup>+</sup> NK Cells                 | pMAPKAPK2         | 0.007866 | -0.01512    |
| IL-2/4/6, GM-CSF | CD56 <sup>lo</sup> CD16 <sup>+</sup> NK Cells                 | pSTAT6            | 0.009146 | 0.015572    |
| IL-2/4/6, GM-CSF | CD56 <sup>+</sup> CD16 <sup>-</sup> NK Cells                  | pMAPKAPK2         | 0.0106   | -0.02112    |
| IL-2/4/6, GM-CSF | CD56 <sup>lo</sup> CD16 <sup>+</sup> NK Cells                 | pSTAT3            | 0.0106   | -0.01994    |
| IL-2/4/6, GM-CSF | Tbet <sup>+</sup> CD4 <sup>+</sup> CD45RA <sup>-</sup> Tcells | pNF- $\kappa$ B   | 0.0106   | 0.024192    |
| IL-2/4/6, GM-CSF | CD56 <sup>lo</sup> CD16 <sup>+</sup> NK Cells                 | pMAPKAPK2         | 0.014108 | -0.00887    |
| IL-2/4/6, GM-CSF | pDCs                                                          | pMAPKAPK2         | 0.014108 | -0.0179     |
| PgLPS            | cMCs                                                          | pSTAT6            | 0.016203 | 0.027337    |
| IL-2/4/6, GM-CSF | CD56 <sup>+</sup> CD16 <sup>-</sup> NK Cells                  | pSTAT1            | 0.018554 | -0.00783    |
| IFN $\alpha$     | CD8 <sup>+</sup> T-cells <sub>naive</sub>                     | prpS6             | 0.018554 | 0.017136    |
| PgLPS            | cMCs                                                          | pSTAT5            | 0.018554 | 0.009459    |
| PgLPS            | Tbet <sup>+</sup> CD4 <sup>+</sup> Naïve T-cells              | I $\kappa$ B      | 0.021187 | 0.017232    |
| IL-2/4/6, GM-CSF | B-cells                                                       | pCREB             | 0.024124 | -0.02798    |
| IL-2/4/6, GM-CSF | CD56 <sup>+</sup> CD16 <sup>-</sup> NK Cells                  | pERK              | 0.024124 | -0.01574    |
| IL-2/4/6, GM-CSF | NK Cells                                                      | pSTAT3            | 0.027396 | -0.00357    |
| TNF $\alpha$     | CD56 <sup>+</sup> CD16 <sup>-</sup> NK Cells                  | pCREB             | 0.027396 | 0.006399    |
| TNF $\alpha$     | Th1 cells                                                     | pSTAT6            | 0.027396 | 0.022404    |
| PgLPS            | cMCs                                                          | pCREB             | 0.031025 | 0.01195     |
| PgLPS            | mDCs                                                          | pCREB             | 0.031025 | 0.016026    |
| IFN $\alpha$     | intMCs                                                        | pP38              | 0.039482 | -0.02993    |
| IL-2/4/6, GM-CSF | intMCs                                                        | pSTAT1            | 0.044369 | -0.0104     |
| IL-2/4/6, GM-CSF | pDCs                                                          | prpS6             | 0.044369 | -0.00693    |
| IL-2/4/6, GM-CSF | CD4 <sup>+</sup> T-cells <sub>mem</sub>                       | I $\kappa$ B      | 0.049736 | -0.02753    |
| PgLPS            | cMCs                                                          | pERK              | 0.049736 | 0.010535    |
| PgLPS            | cMCs                                                          | pNF- $\kappa$ B   | 0.049736 | 0.019028    |
| PgLPS            | Grans                                                         | pNF- $\kappa$ B   | 0.049736 | 0.004326    |
| PgLPS            | M-MDSCs                                                       | pERK              | 0.049736 | 0.00597     |
| TNF $\alpha$     | B-cells                                                       | pCREB             | 0.049736 | -0.00581    |
| TNF $\alpha$     | CD56 <sup>+</sup> CD16 <sup>-</sup> NK Cells                  | pSTAT6            | 0.049736 | -0.01541    |

**Appendix Table 4. Complete Features of Interest.**

| Stimulation             | Cell Type                                                          | Activated Protein(s)                                      |
|-------------------------|--------------------------------------------------------------------|-----------------------------------------------------------|
| <i>Pg</i> LPS           | cMCs                                                               | STAT6, <b>CREB</b> ↑, STAT5, <b>NF-κB</b> ↑, <b>ERK</b> ↑ |
| <i>Pg</i> LPS           | Grans                                                              | <b>NF-κB</b> ↑                                            |
| <i>Pg</i> LPS           | mDCs                                                               | <b>CREB</b> ↑, STAT5                                      |
| <i>Pg</i> LPS           | M-MDSCs                                                            | <b>ERK</b> ↑, STAT6                                       |
| <i>Pg</i> LPS           | CD8 <sup>+</sup> T <sub>naive</sub> Cells                          | STAT1                                                     |
| <i>Pg</i> LPS           | ncMCs                                                              | STAT5                                                     |
| <i>Pg</i> LPS           | CD45RA <sup>+</sup> Tbet <sup>+</sup> CD4 <sup>+</sup> Tcells      | IκB                                                       |
| TNFα                    | NK Cells                                                           | <b>MAPKAPK2</b> ↓                                         |
| TNFα                    | CD56 <sup>+</sup> CD16 <sup>-</sup> NK Cells                       | <b>CREB</b> ↑, STAT6                                      |
| TNFα                    | CD56 <sup>lo</sup> CD16 <sup>+</sup> NK Cells                      | <b>MAPKAPK2</b> ↓                                         |
| TNFα                    | B Cells                                                            | <b>CREB</b> ↓                                             |
| TNFα                    | CD45RA <sup>+</sup> Tbet <sup>+</sup> CD4 <sup>+</sup> (Th1) Cells | STAT6                                                     |
| IFNα                    | intMCs                                                             | p38                                                       |
| IFNα                    | CD8 <sup>+</sup> T <sub>naive</sub> Cells                          | CREB, S6                                                  |
| <b>IL-2/4/6, GM-CSF</b> | CD56 <sup>+</sup> CD16 <sup>-</sup> NK Cells                       | <b>STAT1</b> ↓, <b>MAPKAPK2</b> , <b>ERK</b> ↓            |
| <b>IL-2/4/6, GM-CSF</b> | B cells                                                            | CREB                                                      |
| <b>IL-2/4/6, GM-CSF</b> | CD56 <sup>lo</sup> CD16 <sup>+</sup> NK Cells                      | <b>STAT1</b> ↓, <b>STAT3</b> ↓, <b>MAPKAPK2</b>           |
| <b>IL-2/4/6, GM-CSF</b> | intMCs                                                             | <b>STAT1</b> ↓                                            |
| <b>IL-2/4/6, GM-CSF</b> | CD4 <sup>+</sup> T <sub>mem</sub> Cells                            | IκB                                                       |
| <b>IL-2/4/6, GM-CSF</b> | NK cells                                                           | <b>STAT1</b> ↓, <b>STAT3</b> ↓, <b>MAPKAPK2</b>           |
| <b>IL-2/4/6, GM-CSF</b> | pDCs                                                               | S6, <b>MAPKAPK2</b>                                       |
| <b>IL-2/4/6, GM-CSF</b> | CD45RA <sup>+</sup> Tbet <sup>+</sup> CD4 <sup>+</sup> Tcells      | <b>NF-κB</b>                                              |

Top model features distinguishing patients from controls at baseline (univariate  $p < 0.05$ ). Thirteen features are from LPS stimulation, six are from IFNα stimulation, and 15 are from IL-2/4/6, GM-CSF stimulation. In bold are the 17 features in the cell signaling-based penalization matrix with arrows indicating whether the feature is increased or decreased in patients with ChP compared to controls.

**Appendix Table 5. Clinical Correlation**

| <b>Immune Feature</b>                                                                               | <b>Clinical Feature</b>                       | <b>Statistical Test Value</b>                                   | <b>sig*</b> |
|-----------------------------------------------------------------------------------------------------|-----------------------------------------------|-----------------------------------------------------------------|-------------|
| <b>pMAPKAPK2 in CD56<sup>lo</sup>CD16<sup>+</sup>NK Cells in response to TNF<math>\alpha</math></b> | Periodontal Classification (Stage III vs. IV) | t(12) = 4.62<br>(higher stage ChP → lower pMAPKAPK2)            | 0.001*      |
| <b>pCREB in CD56<sup>+</sup>CD16<sup>-</sup> NK cells in response to TNF<math>\alpha</math></b>     | Periodontal Classification (Stage III vs. IV) | t(12) = -2.70<br>(higher stage ChP → higher pCREB)              | 0.02        |
| <b>pERK in cMCs in response to PgLPS</b>                                                            | Missing teeth                                 | r = 0.58, n = 14<br>(more missing teeth → higher pERK)          | 0.03        |
| <b>pERK in M-MDSCs in response to PgLPS</b>                                                         | Missing teeth                                 | r = 0.60, n = 14<br>(more missing teeth → more pERK)            | 0.023       |
| <b>pMAPKAPK2 in CD56<sup>+</sup> NKcells in response to TNF<math>\alpha</math></b>                  | Largest Clinical Attachment Loss              | r = 0.56, n = 14<br>(greater attachment loss → more pMAPKAPK2)  | 0.037       |
| <b>pSTAT1 in intMCs in response to IL-2/4/6, GM-CSF</b>                                             | Pockets $\geq$ 5mm                            | r = -0.53, n = 14<br>(larger number of pockets → lower pSTAT1)  | 0.049       |
| <b>pSTAT1 in CD56<sup>+</sup>NKcells in response to IL-2/4/6, GM-CSF</b>                            | Radiographic Calculus                         | r = 0.543, n = 14<br>(more radiographic calculus → more pSTAT1) | 0.045       |

\*Significance assessed at the Bonferroni-corrected  $\alpha$  level of 0.0033 corrected for 15 comparisons

**Appendix Table 6. Differences in cell frequencies following 15 minute *ex vivo* cytokine stimulation.**

| <b>Cell Type</b>                                  | <b>Unstim</b>  | <b>P. gingivalis</b> | <b>TNF<math>\alpha</math></b> | <b>IFN<math>\alpha</math></b> | <b>Cocktail</b> |
|---------------------------------------------------|----------------|----------------------|-------------------------------|-------------------------------|-----------------|
| <b>Neutrophils</b>                                | 52.37 (9.6)    | 53.42 (8.89)         | 52.87 (9.6)                   | 52.91 (9.4)                   | 52.81 (9.0)     |
| <b>Classical Monocytes</b>                        | 13.50 (5.8)    | 12.15 (5.4)          | 12.65 (5.7)                   | 13.41 (5.7)                   | 12.51 (5.3)     |
| <b>Intermediate Monocytes</b>                     | 0.49 (0.4)     | 0.30 (0.3)           | 0.31 (0.3)                    | 0.46 (0.5)                    | 0.43 (0.3)      |
| <b>Non-classical MCs</b>                          | 1.56 (0.7)     | 1.37 (0.6)           | 1.37 (0.7)                    | 1.62 (0.7)                    | 1.51 (0.7)      |
| <b>Plasmacytoid Dendritic Cells</b>               | 0.07 (5.6E-02) | 0.08 (5.1E-02)       | 0.06 (4.4E-02)                | 0.07 (6.5E-02)                | 0.04 (4.4E-02)  |
| <b>Myeloid Dendritic Cells</b>                    | 0.47 (1.4)     | 0.66 (1.3)           | 0.64 (1.5)                    | 0.48 (1.4)                    | 0.46 (1.2)      |
| <b>CD56<sup>+</sup>CD16<sup>-</sup> NK Cells</b>  | 0.34 (0.7)     | 0.32 (0.6)           | 0.34 (0.6)                    | 0.30 (0.6)                    | 0.24 (0.4)      |
| <b>CD56<sup>lo</sup>CD16<sup>+</sup> NK Cells</b> | 6.43 (2.3)     | 6.63 (2.3)           | 6.57 (2.2)                    | 6.63 (2.3)                    | 6.32 (2.3)      |
| <b>B Cells</b>                                    | 10.38 (4.2)    | 10.73 (4.3)          | 10.27 (4.2)                   | 10.09 (4.3)                   | 10.40 (4.5)     |
| <b>CD4<sup>+</sup> T<sub>mem</sub> Cells</b>      | 21.54 (6.5)    | 22.15 (6.5)          | 22.01 (6.5)                   | 21.54 (6.4)                   | 22.25 (6.6)     |
| <b>CD4<sup>+</sup> T<sub>naive</sub> Cells</b>    | 15.72 (5.8)    | 15.56 (5.9)          | 16.05 (5.9)                   | 15.66 (5.7)                   | 16.45 (5.8)     |
| <b>CD8<sup>+</sup> T<sub>mem</sub> Cells</b>      | 8.13 (3.4)     | 8.32 (3.3)           | 8.33 (3.2)                    | 8.29 (3.3)                    | 7.99 (3.3)      |
| <b>CD8<sup>+</sup> T<sub>naive</sub> Cells</b>    | 9.85 (4.4)     | 10.06 (4.6)          | 9.93 (4.5)                    | 10.08 (4.4)                   | 10.32 (4.4)     |
| <b>Regulatory T Cells</b>                         | 1.37 (0.4)     | 1.48 (0.5)           | 1.57 (0.5)                    | 1.31 (0.4)                    | 1.62 (0.5)      |

## Supplemental References

- Aghaeepour N, Ganio EA, McIlwain D, Tsai AS, Tingle M, Van Gassen S, Gaudilliere DK, Baca Q, McNeil L, Okada R et al. 2017. An immune clock of human pregnancy. *Sci Immunol.* 2(15).
- Behbehani GK, Thom C, Zunder ER, Finck R, Gaudilliere B, Fragiadakis GK, Fantl WJ, Nolan GP. 2014. Transient partial permeabilization with saponin enables cellular barcoding prior to surface marker staining. *Cytometry A.* 85(12):1011-1019.
- Finck R, Simonds EF, Jager A, Krishnaswamy S, Sachs K, Fantl W, Pe'er D, Nolan GP, Bendall SC. 2013. Normalization of mass cytometry data with bead standards. *Cytometry A.* 83(5):483-494.
- Graves DT, Cochran D. 2003. The contribution of interleukin-1 and tumor necrosis factor to periodontal tissue destruction. *J Periodontol.* 74(3):391-401.
- Hegde R, Awan KH. 2018. Effects of periodontal disease on systemic health. *Dis Mon.*
- Hoerl AE, Kennard RW. 1970. Ridge regression: Biased estimation for nonorthogonal problems. *Technometrics.* 12(1):55-67.
- Kocgozlu L, Elkaim R, Tenenbaum H, Werner S. 2009. Variable cell responses to p. *Gingivalis* lipopolysaccharide. *J Dent Res.* 88(8):741-745.
- Martin M, Katz J, Vogel SN, Michalek SM. 2001. Differential induction of endotoxin tolerance by lipopolysaccharides derived from *porphyromonas gingivalis* and *escherichia coli*. *J Immunol.* 167(9):5278-5285.
- McFarlane CG, Meikle MC. 1991. Interleukin-2, interleukin-2 receptor and interleukin-4 levels are elevated in the sera of patients with periodontal disease. *J Periodontal Res.* 26(5):402-408.
- Mizraji G, Nassar M, Segev H, Sharawi H, Eli-Berchoer L, Capucha T, Nir T, Tabib Y, Maimon A, Dishon S et al. 2017. *Porphyromonas gingivalis* promotes unrestrained type i interferon production by dysregulating tam signaling via myd88 degradation. *Cell Rep.* 18(2):419-431.
- Tibshirani R. 1996. Regression shrinkage and selection via the lasso. *Journal of the Royal Statistical Society Series B (Methodological).* 58(1):267-288.
- Zunder ER, Finck R, Behbehani GK, Amir E-AD, Krishnaswamy S, Gonzalez VD, Lorang CG, Bjornson Z, Spitzer MH, Bodenmiller B et al. 2015. Palladium-based mass tag cell barcoding with a doublet-filtering scheme and single-cell deconvolution algorithm. *Nat Protoc.* 10(2):316-333.
